# Supplementary material for: The impact of image dynamic range on texture classification of brain white matter
Source: Springer Nature journal article supplement (doi:10.1186/1471-2342-8-18), 2008-12-01
Supplement: 12880_2008_58_MOESM1_ESM.pdf [file 12880_2008_58_MOESM1_ESM.pdf]

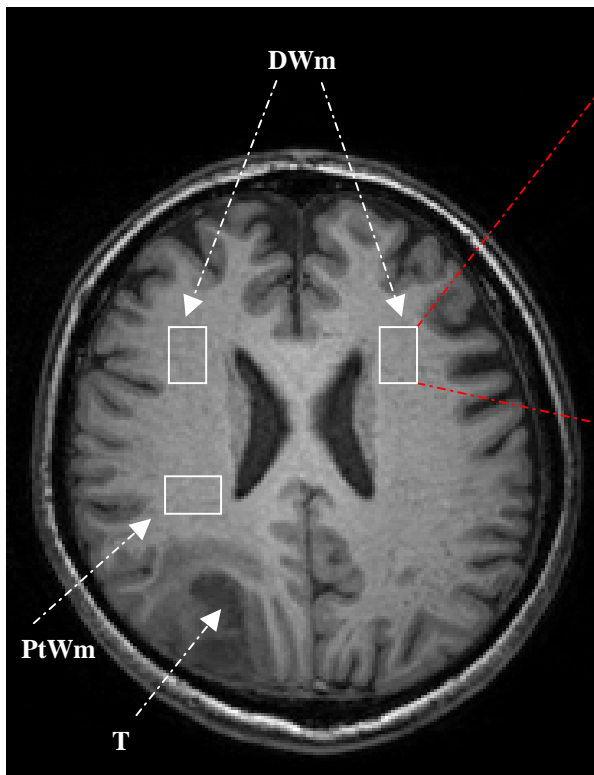

**A**

|     |     |     |     |     |     |     |     |
|-----|-----|-----|-----|-----|-----|-----|-----|
| 231 | 232 | 225 | 229 | 243 | 244 | 236 | 241 |
| 237 | 236 | 224 | 228 | 224 | 243 | 246 | 236 |
| 236 | 229 | 221 | 227 | 218 | 228 | 239 | 224 |
| 230 | 217 | 222 | 226 | 236 | 229 | 227 | 226 |
| 227 | 227 | 224 | 232 | 242 | 234 | 234 | 232 |
| 229 | 233 | 225 | 222 | 230 | 233 | 233 | 222 |
| 229 | 225 | 226 | 222 | 220 | 227 | 227 | 218 |
| 229 | 225 | 226 | 225 | 217 | 220 | 222 | 228 |
| 233 | 239 | 226 | 222 | 222 | 222 | 223 | 218 |
| 238 | 242 | 228 | 238 | 228 | 215 | 236 | 234 |
| 243 | 235 | 217 | 225 | 223 | 219 | 240 | 253 |
| 242 | 237 | 221 | 228 | 226 | 227 | 225 | 244 |
| 223 | 220 | 228 | 232 | 226 | 225 | 218 | 223 |
| 215 | 209 | 215 | 223 | 222 | 228 | 225 | 226 |
| 223 | 220 | 217 | 215 | 211 | 222 | 219 | 226 |
| 220 | 229 | 235 | 220 | 212 | 211 | 211 | 223 |
| 213 | 222 | 222 | 214 | 215 | 215 | 211 | 217 |
| 216 | 224 | 230 | 220 | 217 | 223 | 218 | 217 |

Rescaling to 32 greylevels

**B**

|    |    |    |    |    |    |    |    |
|----|----|----|----|----|----|----|----|
| 29 | 29 | 29 | 29 | 31 | 31 | 30 | 31 |
| 30 | 30 | 28 | 29 | 28 | 31 | 31 | 30 |
| 30 | 29 | 28 | 29 | 28 | 29 | 30 | 28 |
| 29 | 28 | 28 | 29 | 30 | 29 | 29 | 29 |
| 29 | 29 | 28 | 29 | 31 | 30 | 30 | 29 |
| 29 | 30 | 29 | 28 | 29 | 30 | 30 | 28 |
| 29 | 29 | 29 | 28 | 28 | 29 | 29 | 28 |
| 29 | 29 | 29 | 29 | 28 | 28 | 28 | 29 |
| 30 | 30 | 29 | 28 | 28 | 28 | 28 | 28 |
| 30 | 31 | 29 | 30 | 29 | 27 | 30 | 30 |
| 31 | 30 | 28 | 29 | 28 | 28 | 30 | 32 |
| 31 | 30 | 28 | 29 | 29 | 29 | 29 | 31 |
| 28 | 28 | 29 | 29 | 29 | 29 | 28 | 28 |
| 27 | 27 | 27 | 28 | 28 | 29 | 29 | 29 |
| 28 | 28 | 28 | 27 | 27 | 28 | 28 | 29 |
| 28 | 29 | 30 | 28 | 27 | 27 | 27 | 28 |
| 27 | 28 | 28 | 27 | 27 | 27 | 27 | 28 |
| 27 | 28 | 29 | 28 | 28 | 28 | 28 | 28 |
