# Supplementary material for: The impact of image dynamic range on texture classification of brain white matter
Source: Springer Nature journal article supplement (doi:10.1186/1471-2342-8-18), 2008-12-01

**(a)**

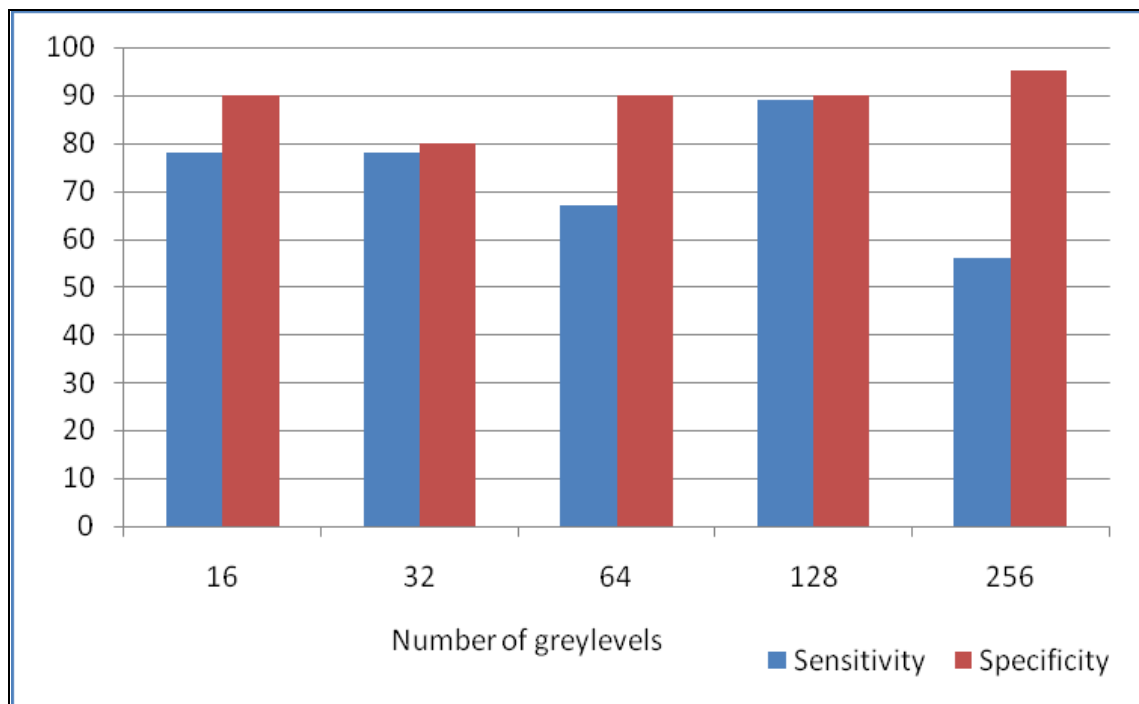

**(b)**

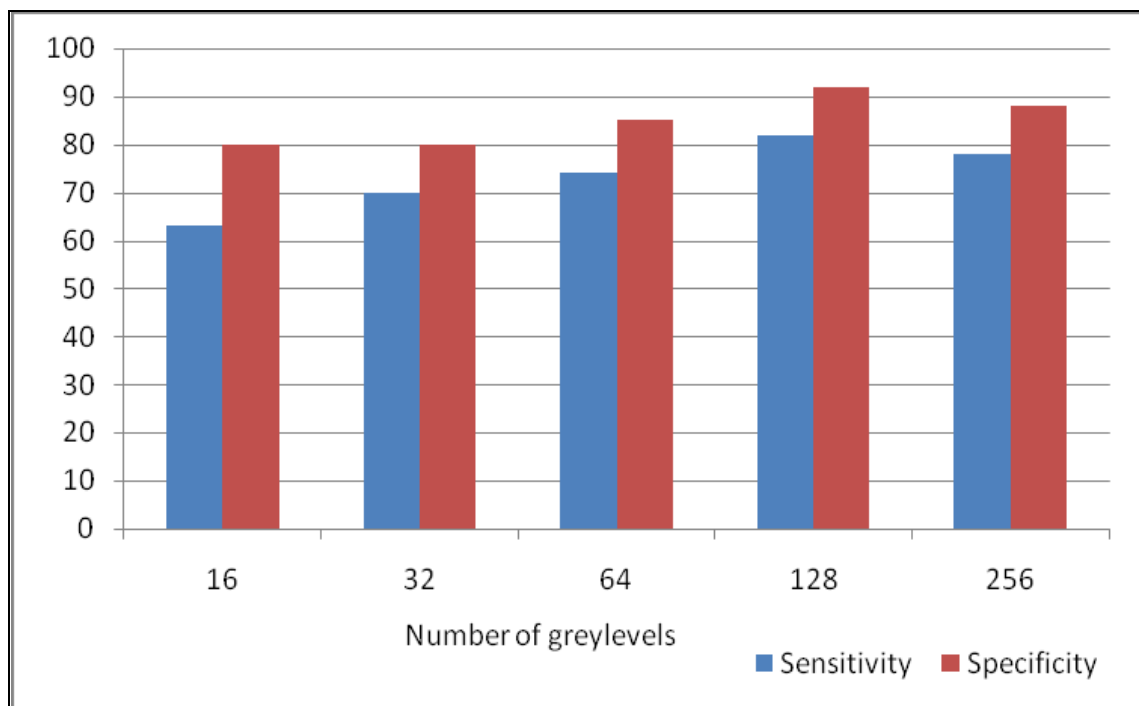

Supplement: 12880_2008_58_MOESM2_ESM.pdf [file 12880_2008_58_MOESM2_ESM.pdf]
